# Supplementary material for: RNF43 and ZNRF3 are commonly altered in serrated pathway colorectal tumorigenesis
Source: PubMed Central journal article supplement (PMC5342576; doi:10.18632/oncotarget.12130), 2016-09-20
Supplement: oncotarget-07-70589-s001.pdf [file oncotarget-07-70589-s001.pdf]

## ***RNF43* and *ZNRF3* are commonly altered in serrated pathway colorectal tumorigenesis**

### **SUPPLEMENTARY FIGURES AND TABLES**

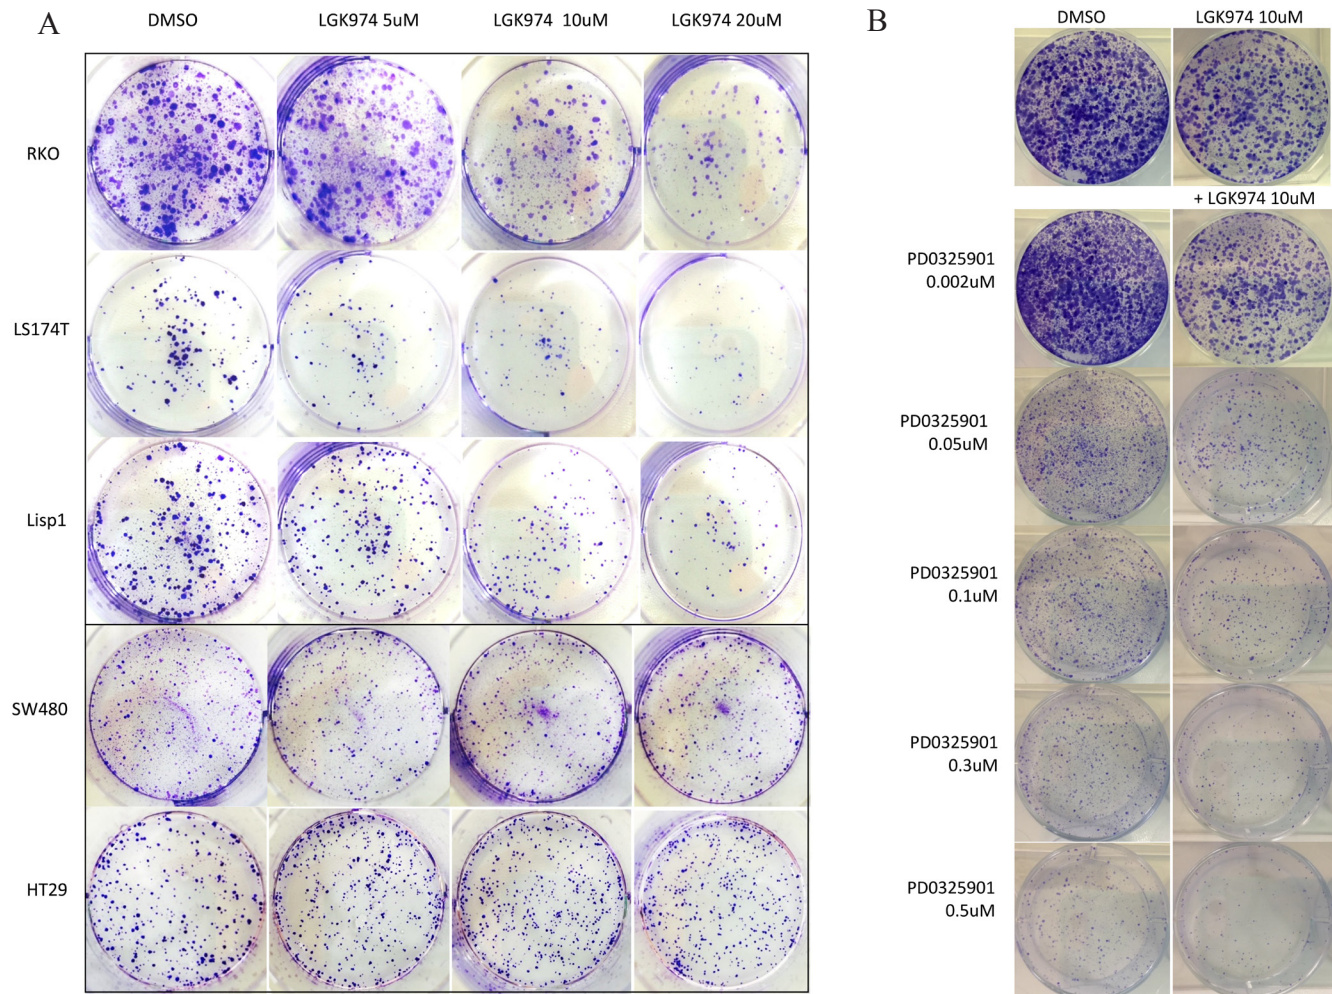

**Supplementary Figure S1:** **A.** Examples of cell colony images showing increasing inhibition of growth of *RNF43/ZNRF3* mutant cell lines (RKO, LS174T, Lisp1) following treatment with increasing concentrations of Porcupine inhibitor (LGK974), compared to unaffected growth of wild type cell lines (SW480, HT29). **B.** Cell colony images showing treatment of RKO with MEK inhibitor (PD0325901) 0.002uM – 0.5uM with and without application of 10uM LGK974. From 0.05uM PD0325901 treatment there was inhibition of growth. This was further accentuated with combination of 10uM LGK974 treatment.

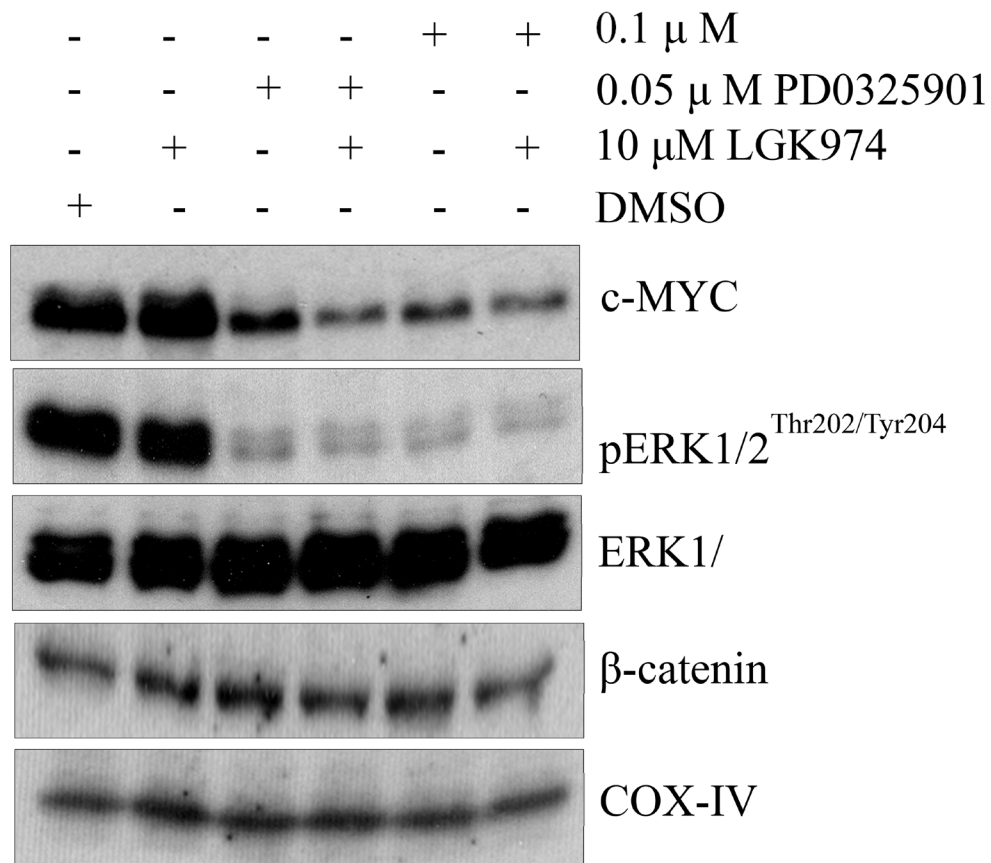

**Supplementary Figure S2: RKO cells were plated and treated with either DMSO, the Porcupine inhibitor LGK974 (at 10 $\mu$ M), and/or the MEK inhibitor PD0325901 (at 0.1 $\mu$ M or 0.05 $\mu$ M). At 48 hour post-treatment, cells were lysed and protein was extracted. Western blots show that upon MEK1/2 and PD0325901 inhibition, there was a marked decrease of phospho- ERK1/2 and c-MYC levels. COX-IV was used as a loading control.**

**Supplementary Table S1: Clinical and molecular data according to A) *RNF43* and B) *ZNRF3* mutation status per cohort**

See Supplementary File 1

**Supplementary Table S2: A) *RNF43* transcript expression values of cancers with *RNF43* mutation data. (*BRAF* mutant/MSI n=13, *BRAF* mutant/MSS n=6, *BRAF* wild type n=27)**

**B) *ZNRF3* transcript expression values of cancers with *ZNRF3* mutation data. (*BRAF* mutant/MSI n=13, *BRAF* mutant/MSS n=6, *BRAF* wild type n=27)**

See Supplementary File 1
